# Supplementary material for: Cephalometric analyses for cleft patients: a statistical approach to compare the variables of Delaire’s craniofacial analysis to Bergen analysis
Source: PubMed Central journal article supplement (PMC8791903; doi:10.1007/s00784-021-04006-3), 2021-05-29
Supplement: 784_2021_4006_MOESM1_ESM.pdf [file 784_2021_4006_MOESM1_ESM.pdf]

|                     | Delaire analysis   |  | Bergen analysis    |                       |
|---------------------|--------------------|--|--------------------|-----------------------|
|                     | Total<br>(n = 217) |  | Total<br>(n = 217) |                       |
| M-CP : C1 (%)       |                    |  | SNA (°)            |                       |
| Median [IQR]        | 51.8 [50.0 – 53.8] |  | Median [IQR]       | 75.0 [71.1 – 78.5]    |
| Mean ± SD           | 51.8 ± 2.7         |  | Mean ± SD          | 74.9 ± 5.5            |
| Skewness; kurtosis* | -0.15; 2.71        |  | Skewness; kurtosis | 0.06; 2.84            |
| M-PTS : C1 (%)      |                    |  | SNB (°)            |                       |
| Median [IQR]        | 27.6 [26.1 – 29.2] |  | Median [IQR]       | 76.1 [73.6 – 79.1]    |
| Mean ± SD           | 27.8 ± 2.1         |  | Mean ± SD          | 76.3 ± 4.6            |
| Skewness; kurtosis  | 0.56; 3.17         |  | Skewness; kurtosis | 0.14; 2.75            |
| PTS-CP : C1 (%)     |                    |  | ANB (°)            |                       |
| Median [IQR]        | 24.2 [22.6 – 25.6] |  | Median [IQR]       | -1.2 [-4.6 – 1.7]     |
| Mean ± SD           | 24.0 ± 2.3         |  | Mean ± SD          | -1.4 ± 4.7            |
| Skewness; kurtosis  | -0.50; 3.99        |  | Skewness; kurtosis | -0.25; 3.14           |
| C2/C1 (%)           |                    |  | NSBa (°)           |                       |
| Median [IQR]        | 84.9 [81.8 – 87.9] |  | Median [IQR]       | 132.4 [128.8 – 136.2] |
| Mean ± SD           | 84.9 ± 4.2         |  | Mean ± SD          | 132.6 ± 5.5           |
| Skewness; kurtosis  | 0.25; 2.67         |  | Skewness; kurtosis | 0.25; 2.69            |
| C3/C1 (°)           |                    |  | arGoGn (°)         |                       |
| Median [IQR]        | 23.1 [21.2 – 25.0] |  | Median [IQR]       | 129.6 [125.6 – 134.6] |
| Mean ± SD           | 23.2 ± 2.8         |  | Mean ± SD          | 129.9 ± 7.1           |
| Skewness; kurtosis  | 0.36; 3.66         |  | Skewness; kurtosis | 0.22; 3.76            |
| ANS-PNS/ C3 (°)     |                    |  | ML/NSL (°)         |                       |
| Median [IQR]        | 2.8 [-1.1 – 6.1]   |  | Median [IQR]       | 36.6 [31.5 – 42.2]    |
| Mean ± SD           | 2.7 ± 5.5          |  | Mean ± SD          | 36.8 ± 6.9            |
| Skewness; kurtosis  | 0.07; 3.01         |  | Skewness; kurtosis | 0.16; 2.81            |
| ANS-MET : CF5 (%)   |                    |  | NL/NSL (°)         |                       |
| Median [IQR]        | 60.2 [55.2 – 64.7] |  | Median [IQR]       | 10.3 [7.3 – 13.2]     |
| Mean ± SD           | 60.4 ± 7.7         |  | Mean ± SD          | 10.1 ± 5.0            |
| Skewness; kurtosis  | 0.26; 3.06         |  | Skewness; kurtosis | -0.06; 3.33           |
| CF3/ mandpillar (°) |                    |  | ML/NL (°)          |                       |
| Median [IQR]        | -3.2 [-7.8 – 0.6]  |  | Median [IQR]       | 26.9 [21.6 – 31.5]    |
| Mean ± SD           | -3.4 ± 6.1         |  | Mean ± SD          | 26.7 ± 7.3            |
| Skewness; kurtosis  | 0.001; 2.64        |  | Skewness; kurtosis | 0.11; 2.52            |
| visual assessment** |                    |  | Index (%)          |                       |
| CF1 ~ NPC           |                    |  | Median [IQR]       | 75.0 [69.5 – 81.0]    |
| dorsal              | 175 (80.6)         |  | Mean ± SD          | 75.6 ± 9.3            |
| hit                 | 37 (17.1)          |  | Skewness; kurtosis | 0.32; 3.09            |
| ventral             | 5 (2.3)            |  |                    |                       |
| CF1 ~ Me            |                    |  |                    |                       |
| dorsal              | 126 (58.1)         |  |                    |                       |
| hit                 | 46 (21.2)          |  |                    |                       |

|            |            |
|------------|------------|
| ventral    | 45 (20.7)  |
| CF6 ~ mand |            |
| lower      | 33 (15.2)  |
| hit        | 76 (35.0)  |
| higher     | 108 (49.8) |
| CF8 ~ Go   |            |
| lower      | 107 (49.3) |
| hit        | 72 (33.2)  |
| higher     | 38 (17.5)  |
| C4 ~ Cond  |            |
| dorsal     | 19 (8.8)   |
| hit        | 162 (74.6) |
| ventral    | 36 (16.6)  |

Values are number of patients (%) unless stated otherwise

\*a normal distribution would have a skewness of 0 and a kurtosis of 3

\*\*reference line passes through reference point (=hit), resp. dorsal/ventral or lower/higher
